# Supplementary material for: Management of suspected common bile duct stones on cholangiogram during same-stay cholecystectomy for acute gallstone-related disease
Source: Springer Nature journal article supplement (doi:10.1186/s12893-017-0232-z), 2017-04-16
Supplement: MOESM1 [file 12893_2017_232_MOESM1_ESM.pdf]

| Supplementary Table 1: Demographics and presentation comparing intermediate risk patients with or without a common bile duct stone image on cholangiogram |                                            |                  |                     |                         |         |
|-----------------------------------------------------------------------------------------------------------------------------------------------------------|--------------------------------------------|------------------|---------------------|-------------------------|---------|
|                                                                                                                                                           |                                            | Total<br>(N=399) | CBD stone<br>(N=50) | No CBD stone<br>(N=349) | P value |
| Intermediate risk                                                                                                                                         |                                            | N=126            | N=29                | N=97                    |         |
| Gender                                                                                                                                                    | Male, No. (%)                              | 51 (40.5%)       | 8 (27.6%)           | 43 (44.3%)              | .107    |
|                                                                                                                                                           | Female, No. (%)                            | 75 (59.5%)       | 21 (72.4%)          | 54 (55.7%)              |         |
| Age (mean ± SD), years                                                                                                                                    |                                            | 53 ± 21          | 46 ± 24             | 55 ± 20                 | .058    |
| BMI (mean ± SD), kg/m <sup>2</sup>                                                                                                                        |                                            | 28 ± 5           | 30 ± 6              | 27 ± 5                  | .05     |
| Clinical presentation                                                                                                                                     | Fever, No. (%)                             | 13 (10.3%)       | 1 (3.4%)            | 12 (12.4%)              | .166    |
|                                                                                                                                                           | RUQ pain on admission, No. (%)             | 108 (85.7%)      | 23 (79.3%)          | 85 (87.6%)              | .261    |
|                                                                                                                                                           | Associated cholecystitis, No. (%)          | 86 (68.3%)       | 16 (55.2%)          | 70 (72.2%)              | .085    |
| Admission LFTs (mean ± SD)                                                                                                                                | ASAT, IU/L                                 |                  | 219 ± 194           | 87 ± 116                | .002    |
|                                                                                                                                                           | ALAT, IU/L                                 |                  | 243 ± 222           | 92 ± 139                | .002    |
|                                                                                                                                                           | PA, IU/L                                   |                  | 162 ± 113           | 90 ± 52                 | .003    |
|                                                                                                                                                           | GGT, IU/L                                  |                  | 332 ± 308           | 122 ± 181               | .002    |
|                                                                                                                                                           | Total Bilirubin, µmol/L                    |                  | 32 ± 19             | 23 ± 14                 | .017    |
|                                                                                                                                                           | Conjugated Bilirubin, µmol/L               |                  | 20 ± 10             | 11 ± 8                  | .006    |
| Abnormal admission LFTs                                                                                                                                   | ASAT (11-42 IU/L), No. (%)                 | 49 (38.9%)       | 3 (10.3%)           | 46 (47.4%)              | < .001  |
|                                                                                                                                                           | ALAT (9-42 IU/L), No. (%)                  | 52 (41.3%)       | 3 (10.3%)           | 49 (50.5%)              | < .001  |
|                                                                                                                                                           | PA (30-125 IU/L), No. (%)                  | 91 (72.2%)       | 15 (51.7%)          | 76 (78.4%)              | .005    |
|                                                                                                                                                           | GGT (9-35 IU/L), No. (%)                   | 35 (27.8%)       | 1 (3.4%)            | 34 (35.1%)              | < .001  |
|                                                                                                                                                           | Total Bilirubin (7-25 µmol/L), No. (%)     | 75 (59.5%)       | 13 (44.8%)          | 62 (63.9%)              | .066    |
|                                                                                                                                                           | Conjugated Bilirubin (2-9 µmol/L), No. (%) | 27 (21.4%)       | 3 (10.3%)           | 24 (24.7%)              | .097    |

BMI = Body Mass Index, RUQ = Right Upper Quadrant, CBD = Common Bile Duct, LFTs = Liver Function Tests, SD = Standard Deviation.

ASAT = Aspartate Aminotransferase, ALAT = Alanine Aminotransferase, PA = Alkaline Phosphatase, GGT = Gamma-glutamyl Transferase.
